# Supplementary material
Source: PubMed Central journal article supplement (PMC3079396)
Supplement: NIHMS263802-supplement-Supplemental_Figure_1.pdf [file NIHMS263802-supplement-Supplemental_Figure_1.pdf]

# 2DL4 only

# 2DL4 and Rab5

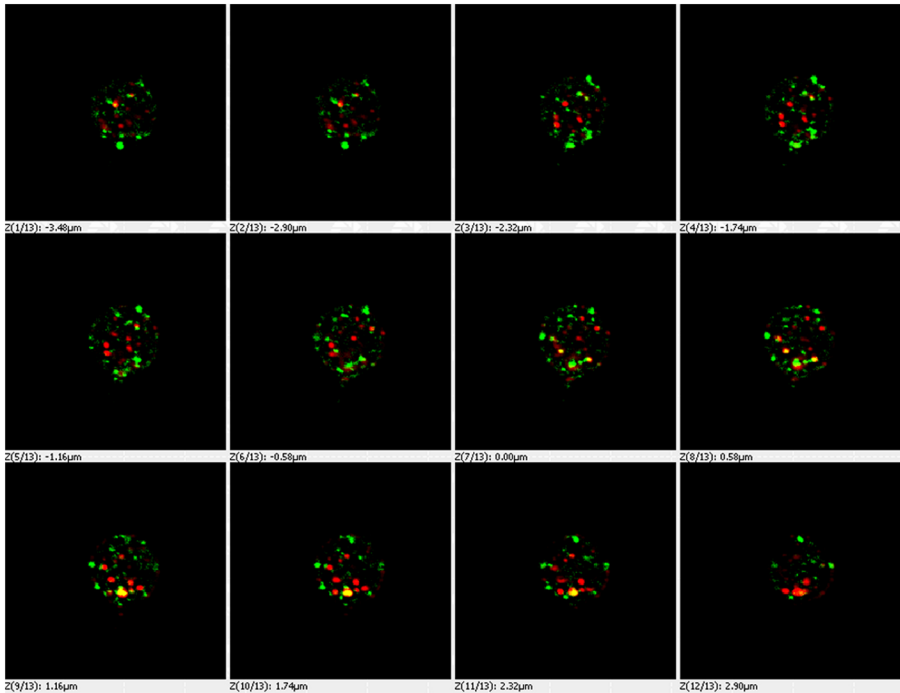

# 2DL4 + Triad3a

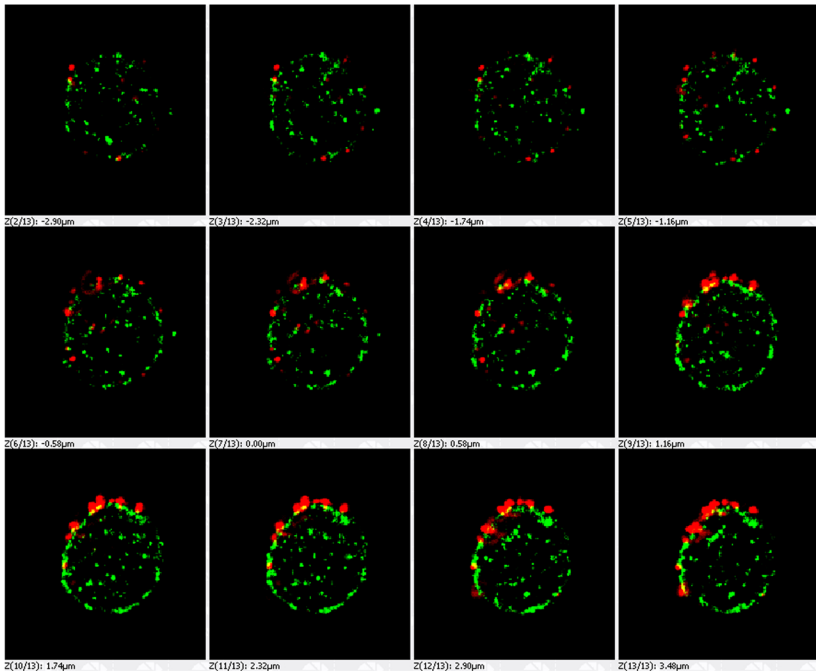

Supplemental Figure 1. Tile array of individual z-sections of 2DL4/Rab5 staining from two cells shown as a max-projection in Figure 8A. Overlaid fluorescence images of individual z-stack sections from two cells stained for Rab5 from each condition ( $\pm$  Triad3A expression). 2DL4 is shown in red and Rab5 is green.
