# Supplementary material
Source: PubMed Central journal article supplement (PMC3079396)
Supplement: NIHMS263802-supplement-Supplemental_Figure_2.pdf [file NIHMS263802-supplement-Supplemental_Figure_2.pdf]

# 2DL4 only

# 2DL4 and EEA1

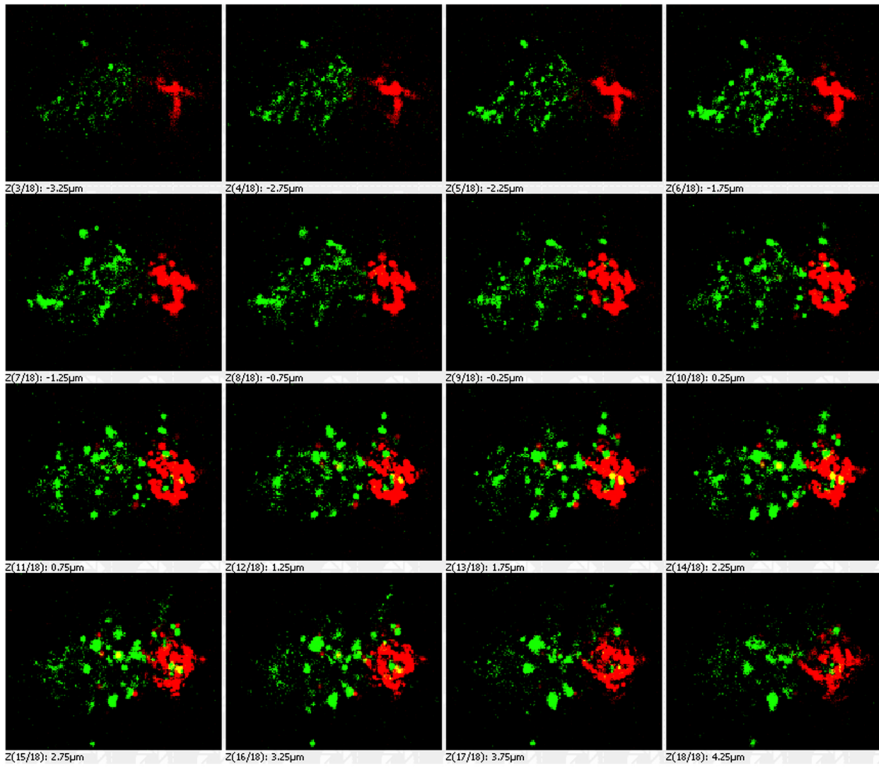

# 2DL4 + Triad3a

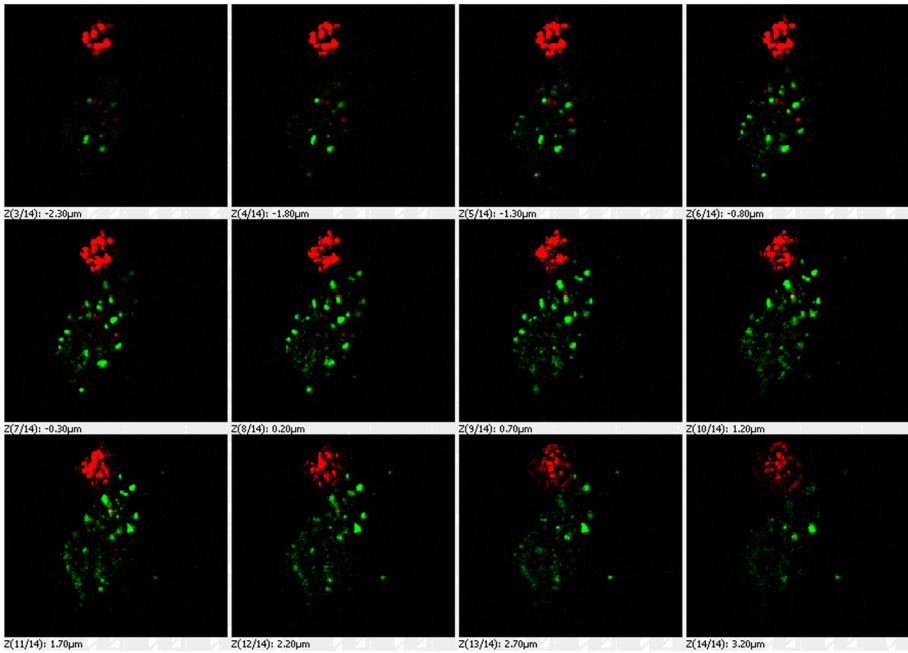

Supplemental Figure 2. Tile array of individual z-sections of 2DL4/EEA1 staining from two cells shown as a max-projection in Figure 8C. Overlaid fluorescence images of individual z-stack sections from two cells stained for EEA1 from each condition ( $\pm$  Triad3A expression). 2DL4 is shown in red and EEA1 is green.
